# Supplementary material
Source: Springer Nature journal article supplement (https://www.springermedizin.de/resource/supplementary/12884_2012_791_MOESM1_ESM.pdf/9458162)
Supplement: MOESM1 [file 9458162]

Enrolled  
n=302

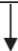

Lost to follow-up  
n=2

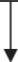

Demographic analysis  
n= 302

Outcome, side-effect, & acceptability analysis  
n=300
